# Supplementary material for: New Mitogenomes of the Polypedilum Generic Complex (Diptera: Chironomidae): Characterization and Phylogenetic Implications
Source: MDPI journal article supplement (doi:10.3390/insects14030238), 2023-02-27
Supplement: s1 [file s1]

Table S1. Sample resources are used in this study

| Speices                                | Sample ID | Topology | Accession Number | Reference  |
|----------------------------------------|-----------|----------|------------------|------------|
| <i>Endochironomus albipennis</i>       | XL1630    | Linear   | OP950227         | This study |
| <i>Endochironomus pekanus</i>          | XL2023    | Circle   | OP950219         | This study |
| <i>Endochironomus tendens</i>          | XL1631    | Linear   | OP950228         | This study |
| <i>Phaenopsectra flavipes</i>          | LGS279    | Circle   | OP950216         | This study |
| <i>Polypedilum heberti</i>             | XL821     | Linear   | OP950225         | This study |
| <i>Polypedilum</i> sp.1                | NAM06     | Circle   | OP950217         | This study |
| <i>Polypedilum nubifer</i>             | /         | Circle   | MZ747090         | [1]        |
| <i>Polypedilum vanderplanki</i>        | /         | Circle   | KT251040         | [2]        |
| <i>Polypedilum yongsanensis</i>        | HHLY216   | Linear   | OP950222         | This study |
| <i>Polypedilum unifascium</i>          | /         | Circle   | MW677959         | [3]        |
| <i>Polypedilum masudai</i>             | XL2759    | Linear   | OK513041         | This study |
| <i>Sergentia baueri</i>                | XL2656    | Circle   | OP950220         | This study |
| <i>Stictochironomus akizukii</i>       | XL1229    | Circle   | OP950218         | This study |
| <i>Stictochironomus juncaii</i>        | XL1582    | Linear   | OP950226         | This study |
| <i>Stictochironomus rosenschoeldi</i>  | XL552     | Linear   | OP950224         | This study |
| <i>Synendotendipes impar</i>           | ITA1      | Linear   | OP950223         | This study |
| <i>Synendotendipes</i> sp.1            | XL3845    | Circle   | OP950221         | This study |
| <i>Stenochironomus baishanzenensis</i> | NLCH802   | Linear   | OL742441         | [4]        |
| <i>Stenochironomus okialbus</i>        | ZJ761     | Circle   | OL753645         | [4]        |

## Reference

1. Xiao, Y.L.; Xu, Z.G.; Wang, J.X.; Fang, X.L.; Fu, Y. Complete mitochondrial genome of a Eurytopic midge, *Polypedilum nubifer* (Diptera: Chironomidae). *Mitochondr. DNA Part B Resour.* **2022**, *7*, 1936–1938. <https://doi.org/10.1080/23802359.2022.2122746>
2. Deviatiiarov, R.; Kikawada, T.; Gusev, O. The complete mitochondrial genome of an anhydrobiotic midge *Polypedilum vanderplanki* (Chironomidae, Diptera). *Mitochondrial DNA Part A* **2017**, *2*, 218–220. <https://doi.org/10.3109/19401736.2015.1115849>
3. Zheng, C.G.; Liu, Z.; Zhao, Y.M.; Wang, Y.; Bu, W.J.; Wang, X.H.; Lin, X.L. First report on mitochondrial gene rearrangement in non-biting midges, revealing a synapomorphy in *Stenochironomus* Kieffer (Diptera: Chironomidae). *Insects* **2022**, *13*, 115. <https://doi.org/10.3390/insects13020115>
4. Zheng, C.G.; Liu, Z.; Zhao, Y.M.; Wang, Y.; Bu, W.J.; Wang, X.H.; Lin, X.L. First report on mitochondrial gene rearrangement in non-biting midges, revealing a synapomorphy in *Stenochironomus* Kieffer (Diptera: Chironomidae). *Insects* **2022**, *13*, 115. <https://doi.org/10.3390/insects13020115>.

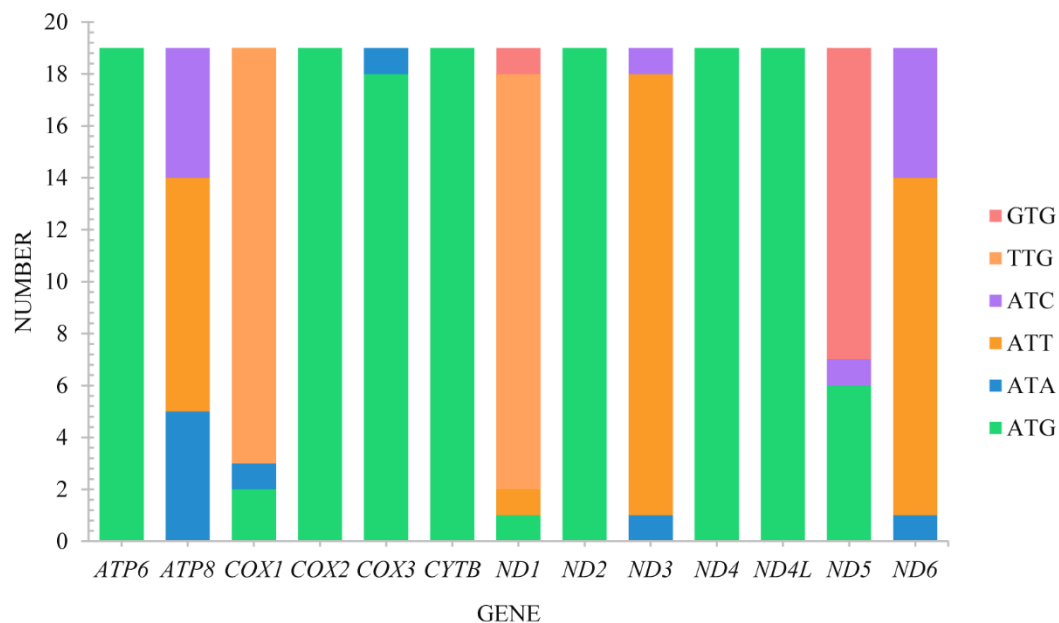

Figure S1. Start codons of protein-coding genes among *Polypedilum* generic complex mitogenomes

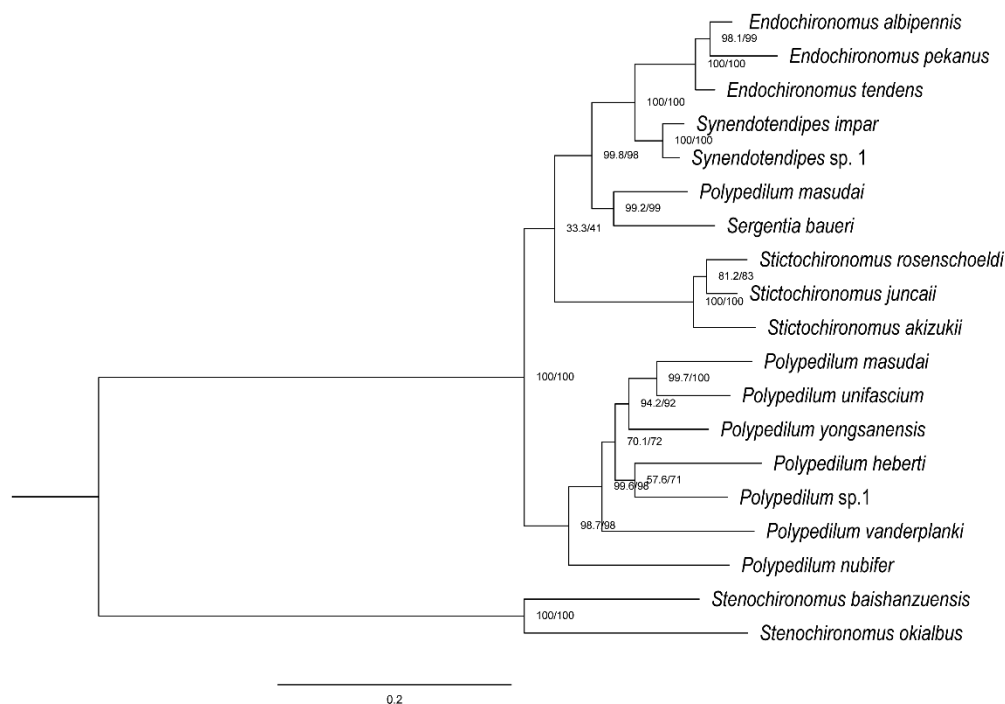

Figure S2. ML phylogenetic tree of *Polypedilum* generic complex based on the analysis of cds\_faa with Partition model in IQTREE. Support values on nodes indicate SH-aLRT/UFBoot2, respectively.

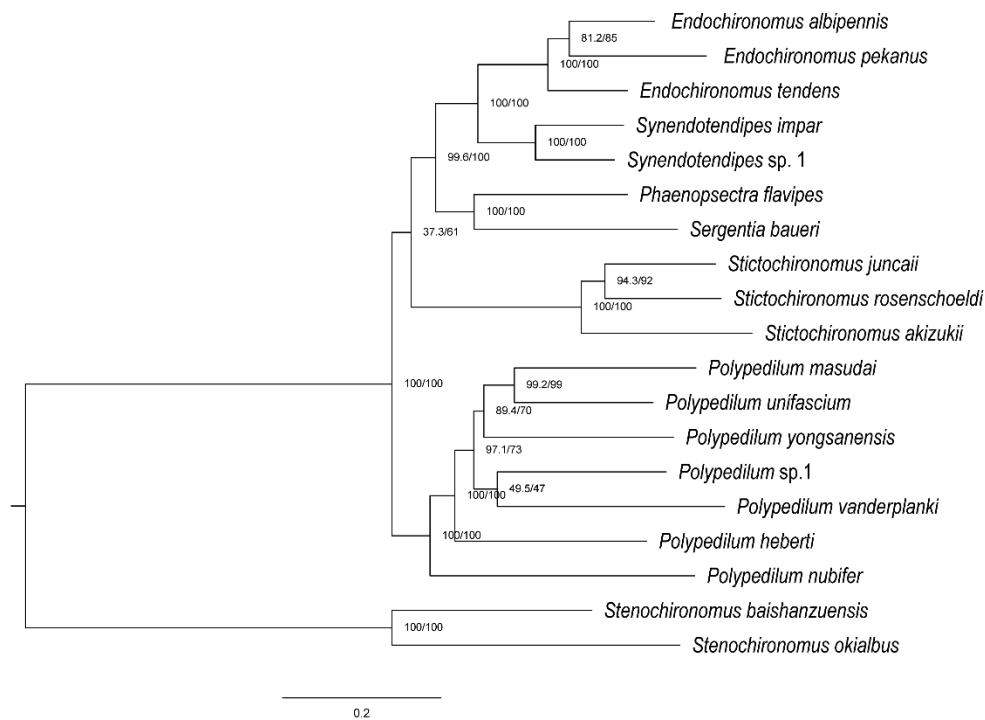

Figure S3. ML phylogenomic tree of *Polypedilum* generic complex based on the analysis *cds\_fna* with Partition model in IQTREE. Support values on nodes indicate SH-aLRT/UFBoot2, respectively

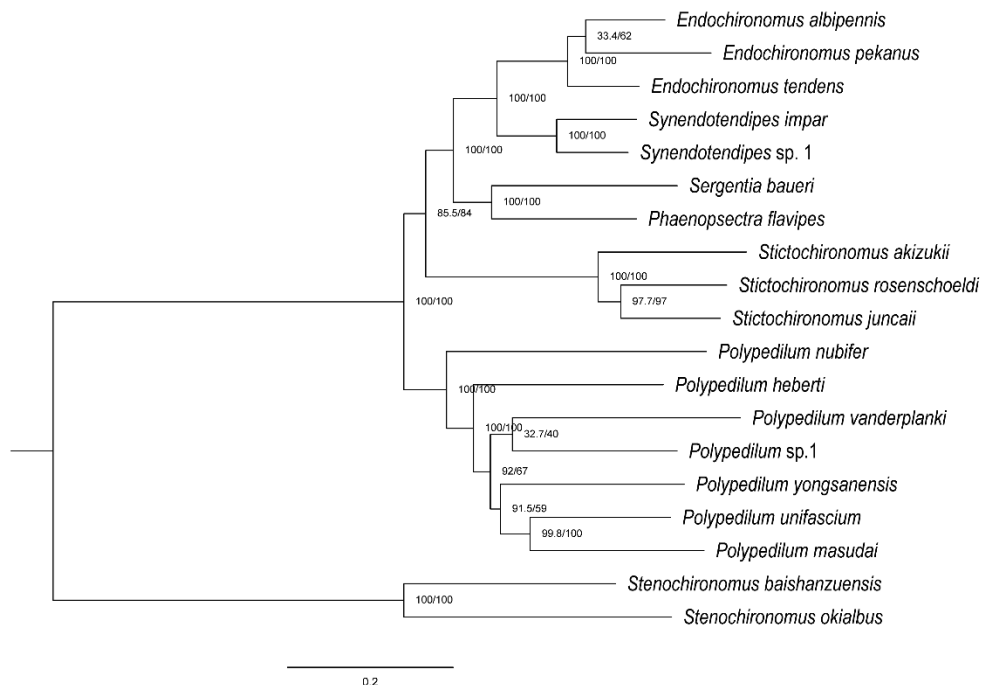

Figure S4. ML phylogenomic tree of *Polypedilum* generic complex based on the analysis *cds\_rna* with Partition model in IQTREE. Support values on nodes indicate SH-aLRT/UFBoot2, respectively

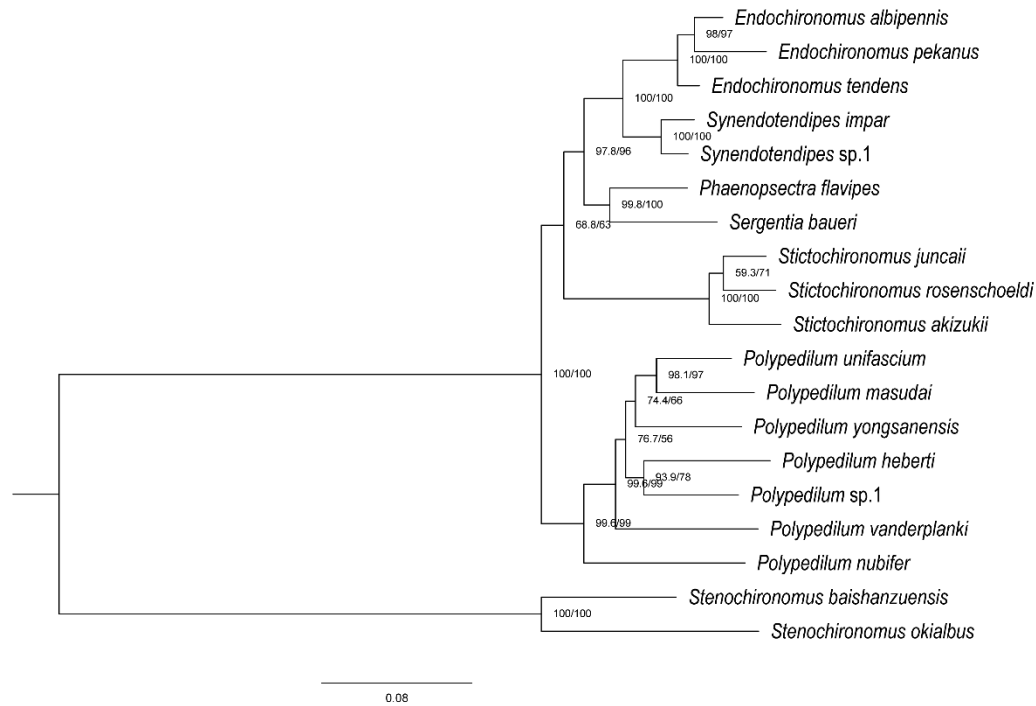

Figure S5. ML phylogenomic tree of *Polypedilum* generic complex based on the analysis *cds12\_fna* with Partition model in IQTREE. Support values on nodes indicate SH-aLRT/UFBoot2, respectively

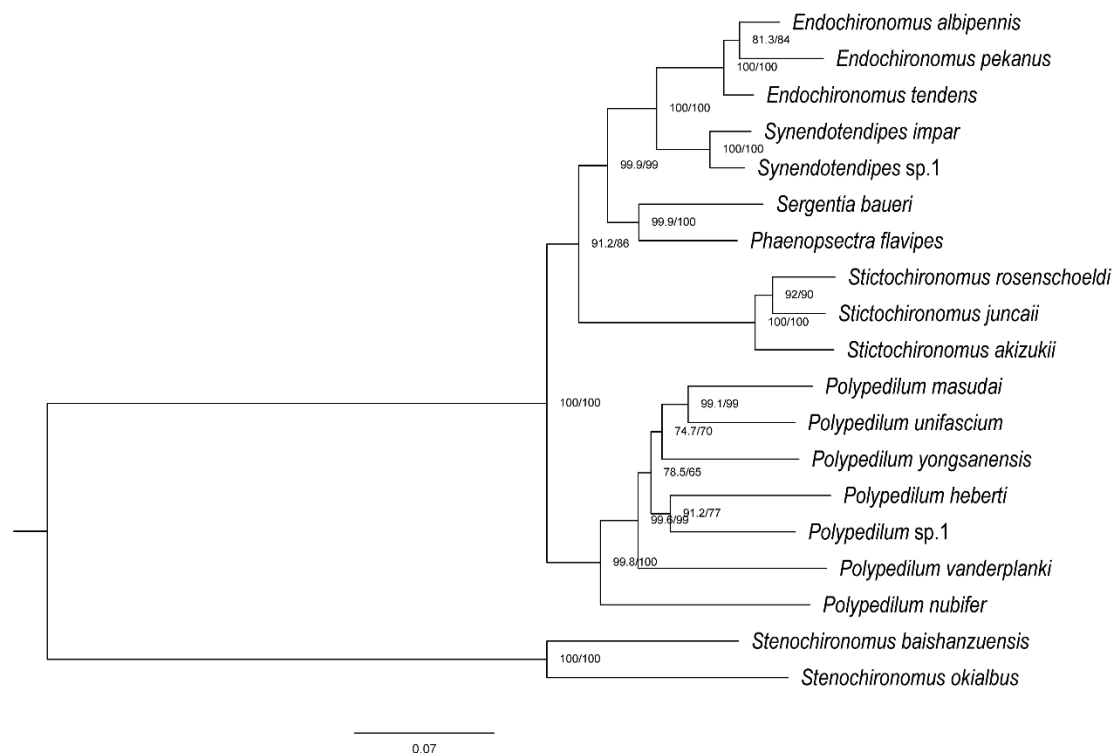

Figure S6. ML phylogenomic tree of *Polypedilum* generic complex based on the analysis *cds12\_rna* with Partition model in IQTREE. Support values on nodes indicate SH-aLRT/UFBoot2, respectively

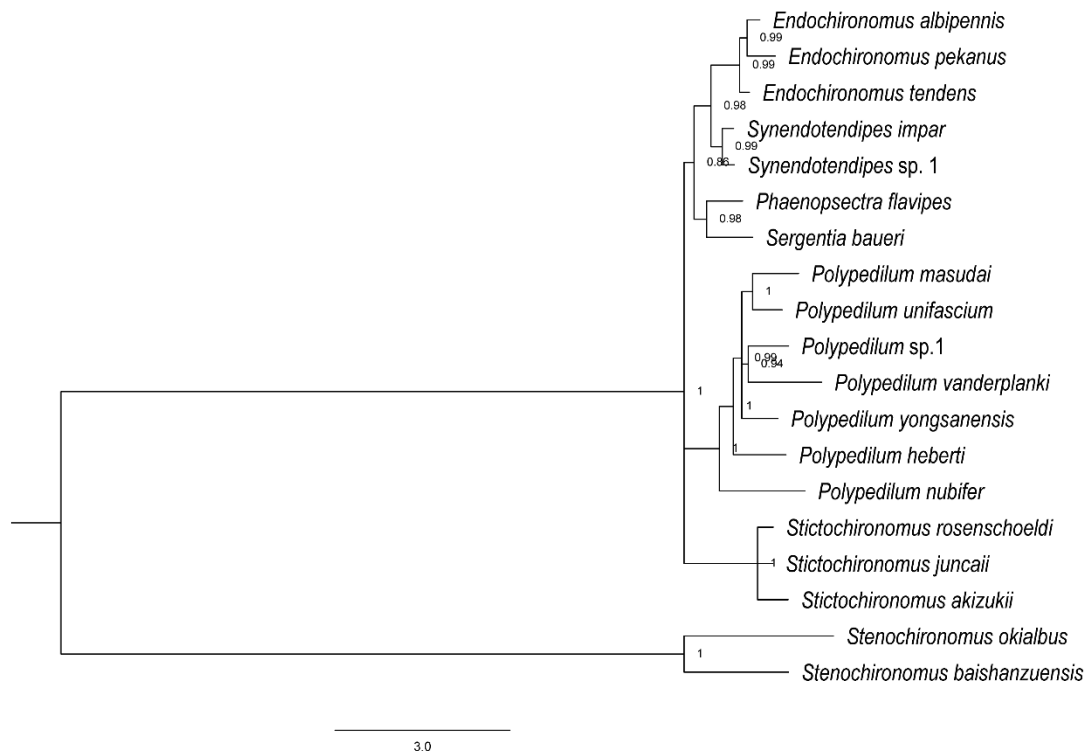

Figure S7. BI phylogenomic tree of *Polypedilum* generic complex based on the analysis cds\_fna with GTR+CAT model in phylobayes. Support values on nodes indicate Bayesian posterior probabilities.

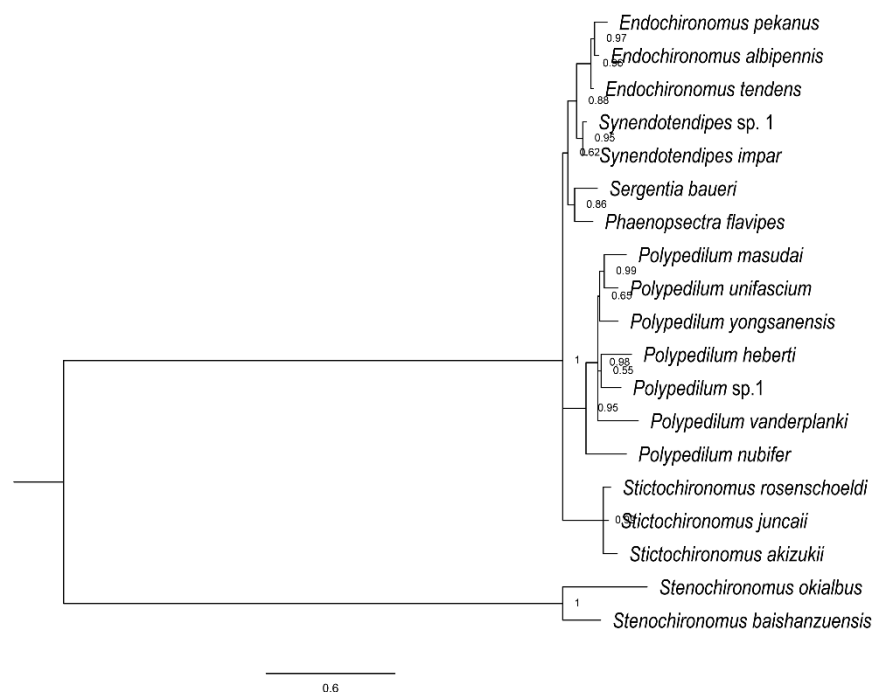

Figure S8. BI phylogenomic tree of *Polypedilum* generic complex based on the analysis cds12\_fna with GTR+CAT model in phylobayes. Support values on nodes indicate Bayesian posterior probabilities.

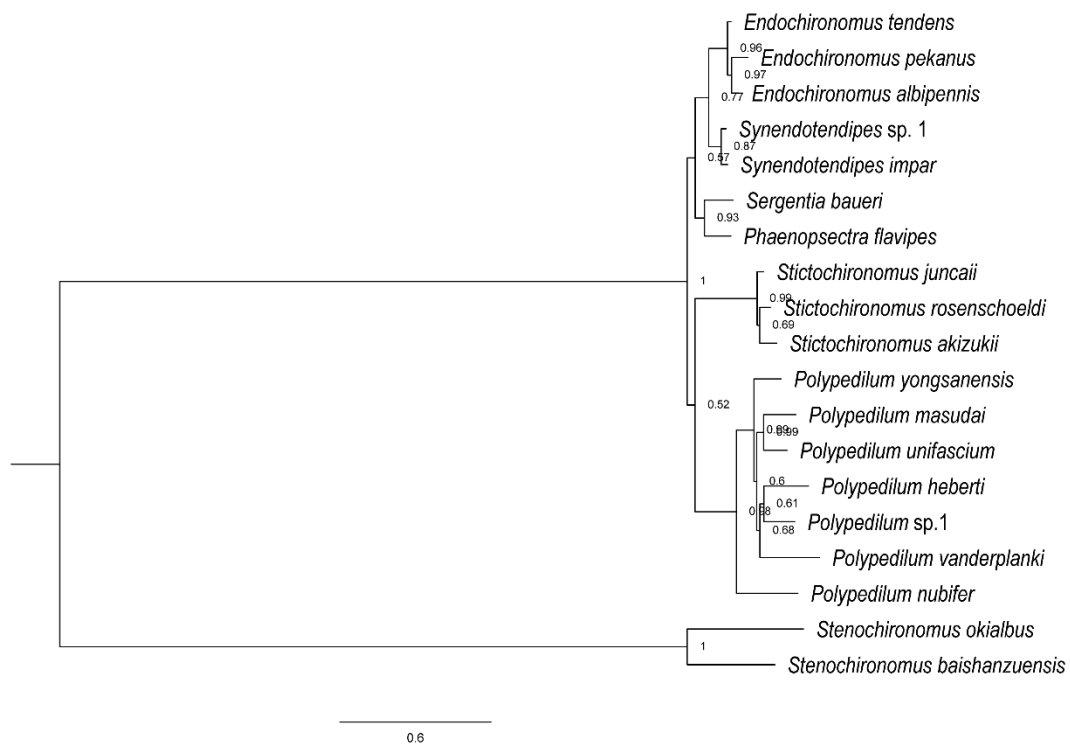

Figure S9. BI phylogenomic tree of *Polypedilum* generic complex based on the analysis cds12\_rrna with GTR+CAT model in phylobayes. Support values on nodes indicate Bayesian posterior probabilities.
